# Supplementary material
Source: PubMed Central journal article supplement (PMC3186397)
Supplement: supp_M111.252395_jbc.M111.252395-1.pdf [file supp_M111.252395_jbc.M111.252395-1.pdf]

## **Online supplemental material**

### **MUSCLE CREATINE KINASE DEFICIENCY TRIGGERS BOTH ACTIN DEPOLYMERIZATION AND DESMIN DISORGANIZATION BY ADVANCED GLYCATION END-PRODUCTS IN DILATED CARDIOMYOPATHY**

**Nicolas Diguët<sup>1</sup>, Youssef Mallat<sup>1</sup>, Romain Ladouce<sup>1</sup>, Gilles Clodic<sup>2</sup>, Alexandre Prola<sup>4</sup>, Eva Tritsch<sup>1</sup>, Jocelyne Blanc<sup>1</sup>, Jean-Christophe Larcher<sup>3</sup>, Claude Delcayre<sup>5</sup>, Jane-Lise Samuel<sup>5</sup>, Bertrand Friguët<sup>1</sup>, Gérard Bolbach<sup>2</sup>, Zhenlin Li<sup>1</sup>, Mathias Mericskay<sup>1</sup>**

From <sup>1</sup>Department of Aging, Stress and Inflammation, <sup>2</sup>IFR83 Mass Spectrometry Facility, <sup>3</sup>CNRS UMR7622 Developmental Biology, UPMC Univ Paris 6, Paris, France; <sup>4</sup>Inserm UMR-S 769, University Paris-Sud 11, Châtenay-Malabry, France and <sup>5</sup>Inserm U942 Biomarkers and Heart Diseases<sup>5</sup> Université Denis Diderot Paris 7, Paris, France.

## TABLES

| Spot No <sup>(a)</sup> | Accession number <sup>(b)</sup> | Protein <sup>(b)</sup>                                      | Function <sup>(c)</sup>                | Score MS <sup>(d)</sup> | Sequence coverage <sup>(d)</sup> | Score MS/MS <sup>(d)</sup> | pI <sup>(d)</sup> | MW <sup>(b)</sup> | FC <sup>(e)</sup> | T-test <sup>(e)</sup> |
|------------------------|---------------------------------|-------------------------------------------------------------|----------------------------------------|-------------------------|----------------------------------|----------------------------|-------------------|-------------------|-------------------|-----------------------|
| UP-REGULATED           |                                 |                                                             |                                        |                         |                                  |                            |                   |                   |                   |                       |
| 30                     | P31001                          | Desmin                                                      | muscle adaptation                      | 420                     | 74%                              | 217                        | 5.21              | 53 465            | 2.88              | 4.4E-06               |
| 31                     | P31001                          | Desmin                                                      | muscle adaptation                      | 153                     | 20%                              | 102                        | 5.21              | 53 465            | 2.73 / 1.37*      | 4.0E-06 / 1.6E-03     |
| 29                     | P31001                          | Desmin                                                      | muscle adaptation                      | 68                      | 19%                              | 40                         | 5.21              | 53 465            | 2.56 / 1.41*      | 5.5E-06 / 1.2E-02     |
| 32                     | P31001                          | Desmin                                                      | muscle adaptation                      | 527                     | 74%                              | 278                        | 5.21              | 53 465            | 2.49 / 1.26*      | 1.2E-05 / 6.9E-03     |
| 22                     | P08238                          | Heat shock protein HSP 90-beta                              | protein folding                        | 148                     | 40%                              | 53                         | 4.97              | 82 373            | 2.31              | 5.2E-06               |
| 37                     | P50462                          | cysteine and glycine-rich protein 3 (Csrp3/ MLP)            | cardiac muscle tissue development      | 66                      | 67%                              | 225                        | 8.90              | 20 881            | 2.3               | 4.6E-05               |
| 36                     | Q00623                          | Apolipoprotein A-I                                          | cholesterol transport                  | 293                     | 48%                              | 162                        | 5.64              | 30 569            | 2.21              | 3.6E-02               |
| 26                     | P09103                          | Protein disulfide-isomerase                                 | cell redox homeostasis                 | 193                     | 42%                              | 74                         | 4.79              | 57 018            | 2.05              | 3.6E-04               |
| 27                     | P20152                          | Vimentin                                                    | intermediate filament-based process    | 190                     | 30%                              | 126                        | 5.06              | 53 655            | 2                 | 8.2E-05               |
| 35                     | P48036                          | Annexin A5                                                  | calcium signaling                      | 332                     | 43%                              | 202                        | 4.83              | 35 730            | 1.95              | 1.1E-04               |
| 43                     | Q9DCX2                          | ATP synthase subunit d. mitochondrial                       | ATP synthesis coupled proton transport | 139                     | 57%                              | 62                         | 5.52              | 18 738            | 1.93              | 3.6E-02               |
| 28                     | P68372                          | Tubulin beta-2C chain                                       | microtubule-based process              | 123                     | 59%                              | 70                         | 4.79              | 49 799            | 1.91              | 3.4E-02               |
| 41                     | P23927                          | Alpha-crystallin B chain                                    | response to stress                     | 53                      | 10%                              | 47                         | 6.76              | 20 056            | 1.58*             | 1.9E-02               |
| 24                     | P63017                          | Heat shock cognate 71 kDa protein                           | protein folding                        | 105                     | 54%                              | 298                        | 5.37              | 70 827            | 1.58              | 1.6E-06               |
| 25                     | P63017                          | Heat shock cognate 71 kDa protein                           | protein folding                        | 524                     | 35%                              | 298                        | 5.37              | 70 827            | 1.53              | 1.4E-05               |
| 33                     | Q61598                          | Rab GDP dissociation inhibitor beta                         | protein transport                      | 103                     | 59%                              | 61                         | 5.93              | 50 505            | 1.52              | 1.8E-04               |
| 42                     | P23927                          | Alpha-crystallin B chain                                    | response to stress                     | n.a.                    | 10%                              | 53                         | 6.76              | 20 056            | 1.49*             | 2.7E-02               |
| 34                     | Q99L47                          | Hsc70-interacting protein (HIP)                             | protein folding                        | 81                      | 21%                              | 62                         | 5.19              | 41 629            | 1.49              | 3.9E-04               |
| 45                     | P05413                          | Fatty acid-binding protein. heart                           | fatty acid metabolic process           | 300                     | 72%                              | 170                        | 6.29              | 14 849            | 1.32*             | 3.0E-02               |
| DOWN-REGULATED         |                                 |                                                             |                                        |                         |                                  |                            |                   |                   |                   |                       |
| 5                      | P21550                          | Beta-enolase                                                | glycolysis                             | 705                     | 82%                              | 361                        | 6.73              | 46 995            | -1.3              | 3.5E-04               |
| 13                     | P05201                          | Aspartate aminotransferase. cytoplasmic                     | cellular amino acid metabolic process  | 376                     | 62%                              | 302                        | 6.68              | 46 202            | -1.31             | 4.5E-04               |
| 17                     | P42125                          | 3,2-trans-enoyl-CoA isomerase. mitochondrial                | fatty acid metabolic process           | 197                     | 21%                              | 130                        | 8.87              | 32 058            | -1.33             | 2.0E-02               |
| 15                     | O35459                          | Delta(3,5)-Delta(2,4)-dienoyl-CoA isomerase. mitochondrial  | fatty acid metabolic process           | 134                     | 31%                              | 94                         | 7.60              | 36 095            | -1.37             | 1.2E-02               |
| 11                     | P45952                          | Medium-chain specific acyl-CoA dehydrogenase. mitochondrial | fatty acid metabolic process           | 95                      | 27%                              | 49                         | 8.60              | 46 452            | -1.38             | 2.8E-04               |
| 8                      | P50752                          | Troponin T. cardiac muscle                                  | cardiac muscle contraction             | 148                     | 30%                              | 67                         | 4.98              | 35 804            | -1.43             | 2.3E-03               |
| 16                     | O35459                          | Delta(3,5)-Delta(2,4)-dienoyl-CoA isomerase. mitochondrial  | fatty acid metabolic process           | 56                      | 4%                               | 56                         | 7.60              | 36 095            | -1.49             | 1.8E-03               |
| 18                     | P48787                          | Troponin I. cardiac muscle                                  | cardiac muscle contraction             | 169                     | 53%                              | 85                         | 9.57              | 24 244            | -1.59             | 1.7E-03               |
| 9                      | P07310                          | Creatine kinase M-type                                      | phosphocreatine metabolic process      | 325                     | 13%                              | 157                        | 6.58              | 43 018            | -2.2 / -1.47*     | 5.0E-06 / 5.3E-06     |
| 10                     | P07310                          | Creatine kinase M-type                                      | phosphocreatine metabolic process      | 225                     | 22%                              | 51                         | 6.58              | 43 018            | -5.8 / -2.02*     | 1.3E-07 / 3.8E-05     |

**Table S1: Differentially expressed proteins in the dilated heart after SRF inactivation.**Ranked by fold change ( $1.3 \leq FC \leq -1.3$ )

(a) Spot no. refers to Fig. 1

(b) SwissProt accession number, protein name and molecular weight (MW).

(c) Biological function indicated by Gene Ontology database.

(d) MASCOT scores for MS and MS/MS profiles following MALDI-TOF and TOF/TOF analyses. Mascot calculated isoelectric point (pI)

(e) Decyder fold change (FC) expressed as an average ratio of mutant over control spot volume and Decyder T-test p-val ( $p \leq 0.05$ ). All FC value are given for the gels analyzed at day 45 after SRF inactivation except for some spots also identified at day 25 (asterisk).

| Spot No <sup>(a)</sup> | Accession number <sup>(b)</sup> | Protein <sup>(b)</sup>                                         | Function <sup>(c)</sup>                | Score MS <sup>(d)</sup> | Sequence coverage <sup>(d)</sup> | pI <sup>(d)</sup> | MW <sup>(b)</sup> | FC <sup>(e)</sup> | T-test <sup>(e)</sup> |
|------------------------|---------------------------------|----------------------------------------------------------------|----------------------------------------|-------------------------|----------------------------------|-------------------|-------------------|-------------------|-----------------------|
| 40                     | Q9R0Y5                          | Adenylate kinase isoenzyme 1                                   | ATP metabolic process                  | 219                     | 51%                              | 5.67              | 21 526            | 2.14              | 1.00E-01              |
| 38                     | Q9DCX2                          | ATP synthase subunit d, mitochondrial                          | ATP synthesis coupled proton transport | 181                     | 59%                              | 5.52              | 18 738            | 2.05              | 7.70E-02              |
| 44                     | Q9DCX2                          | ATP synthase subunit d, mitochondrial                          | ATP synthesis coupled proton transport | 168                     | 93%                              | 5.52              | 18 738            | 2.00              | 1.30E-01              |
| 39                     | Q9DCX2                          | ATP synthase subunit d, mitochondrial                          | ATP synthesis coupled proton transport | 94                      | 49%                              | 5.52              | 18 738            | 1.91              | 2.20E-02              |
| 20                     | Q64727                          | Vinculin                                                       | cell adhesion                          | 63                      | 41%                              | 5.77              | 116 644           | 1.60              | 2.70E-04              |
| 21                     | Q64727                          | Vinculin                                                       | cell adhesion                          | 111                     | 35%                              | 5.77              | 116 644           | 1.58              | 2.50E-04              |
| 23                     | P63017                          | Heat shock cognate 71 kDa protein                              | protein folding                        | 132                     | 38%                              | 5.37              | 70 827            | 1.57              | 2.10E-04              |
| 4                      | P56480                          | ATP synthase subunit beta, mitochondrial                       | ATP biosynthetic process               | 581                     | 71%                              | 5.19              | 56 265            | -1.03             | 6.70E-01              |
| 19                     | P09542                          | Myosin light chain 3                                           | skeletal muscle tissue development     | 292                     | 75%                              | 5.03              | 22 407            | -1.13             | 1.90E-02              |
| 7                      | P68033                          | Actin, alpha cardiac muscle 1                                  | cardiac muscle contraction             | 210                     | 22%                              | 5.23              | 41 992            | -1.23/<br>-1.15*  | 4.7E-02/<br>8.5 E-03  |
| 1                      | Q99K10                          | Aconitate hydratase, mitochondrial                             | metabolic process                      | 125                     | 32%                              | 8.08              | 85 410            | -1.20             | 9.30E-03              |
| 14                     | P58771                          | Tropomyosin alpha-1 chain                                      | cardiac muscle contraction             | 53                      | 41%                              | 4.69              | 32 661            | -1.22             | 1.50E-01              |
| 12                     | Q0KK56                          | Protein FAM184B                                                | unknown                                | 83                      | 65%                              | 5.59              | 107534            | -1.31             | 2.30E-03              |
| 6                      | Q9Z219                          | Succinyl-CoA ligase [ADP-forming] subunit beta, mitochondrial  | tricarboxylic acid cycle               | 68                      | 36%                              | 6.57              | 50 082            | -1.33             | 3.70E-04              |
| 2                      | P41216                          | Long-chain-fatty-acid--CoA ligase 1                            | fatty acid metabolic process           | 105                     | 26%                              | 6.81              | 77 873            | -1.36             | 7.20E-04              |
| 3                      | Q9D0K2                          | Succinyl-CoA:3-ketoacid-coenzyme A transferase 1 mitochondrial | ketone body catabolic process          | 98                      | 46%                              | 8.73              | 55 953            | -1.46             | 4.60E-05              |

**Table S2: Additional cardiac proteins identified by MS only.**

Ranked by average ratio. Spots numbers refer to spots circled in black in Fig. 1

(a) Spot no. refers to Fig. 1

(b) SwissProt accession number, protein name and molecular weight (MW).

(c) Biological function indicated by Gene Ontology database.

(d) MASCOT scores for MS and MS/MS profiles following MALDI-TOF and TOF/TOF analyses. Mascot calculated isoelectric point (pI)

(e) Decyder fold change (FC) expressed as an average ratio of mutant over control spot volume and Decyder T-test p-val. All FC value are given for the gels analyzed at day 45 after SRF inactivation except for some spots also identified at day 25 (asterisk).

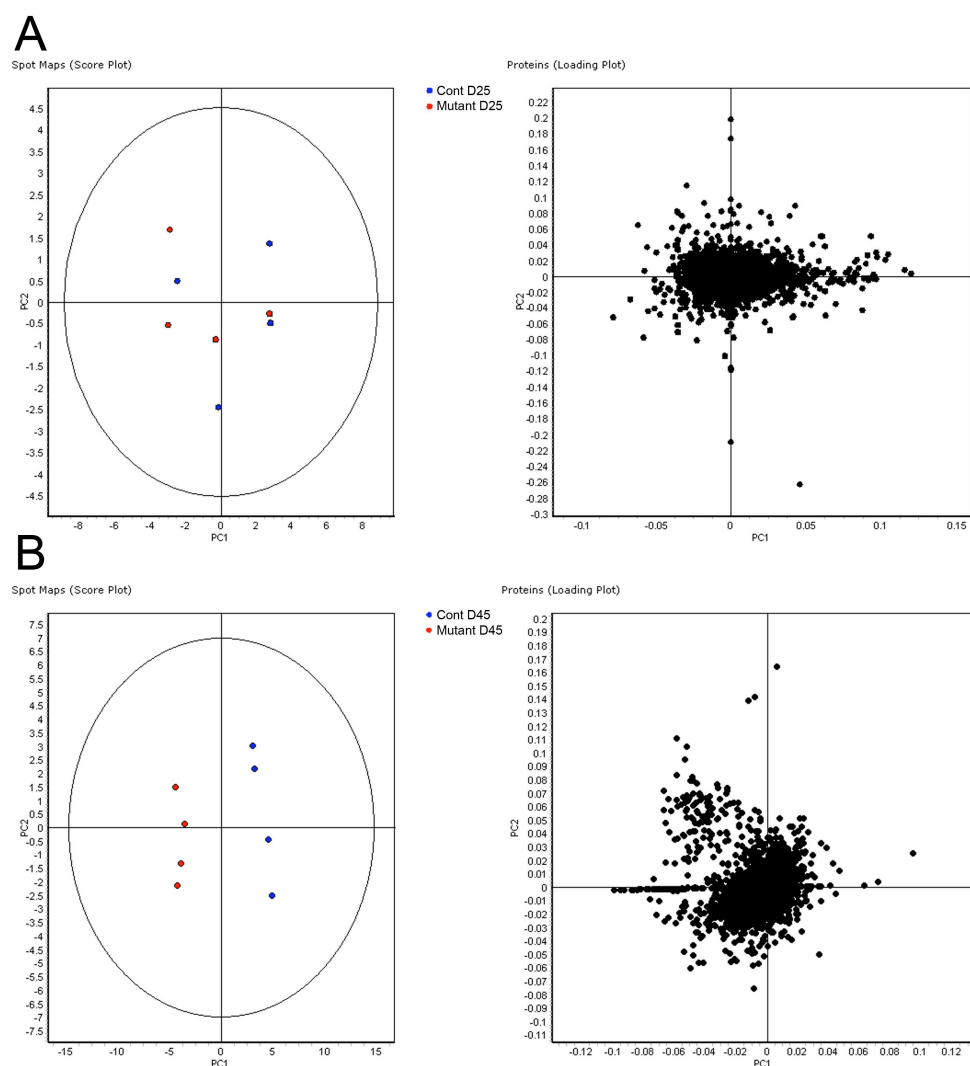

**Fig. S1: Principal component analysis (PCA) of spot maps versus all proteins.** (A) PCA at day 25 with a dataset of 1907 spots. Left panel: spots maps from different experimental group are not separated. Right panel: loading plot of the 1907 spots. (B) PCA at day 45 with a dataset of 2185 spots. Spot maps are separated following experimental groups based on principal component vector 1 (PC1). Therefore, there are major differences between the proteomes of control and mutant hearts at this stage.

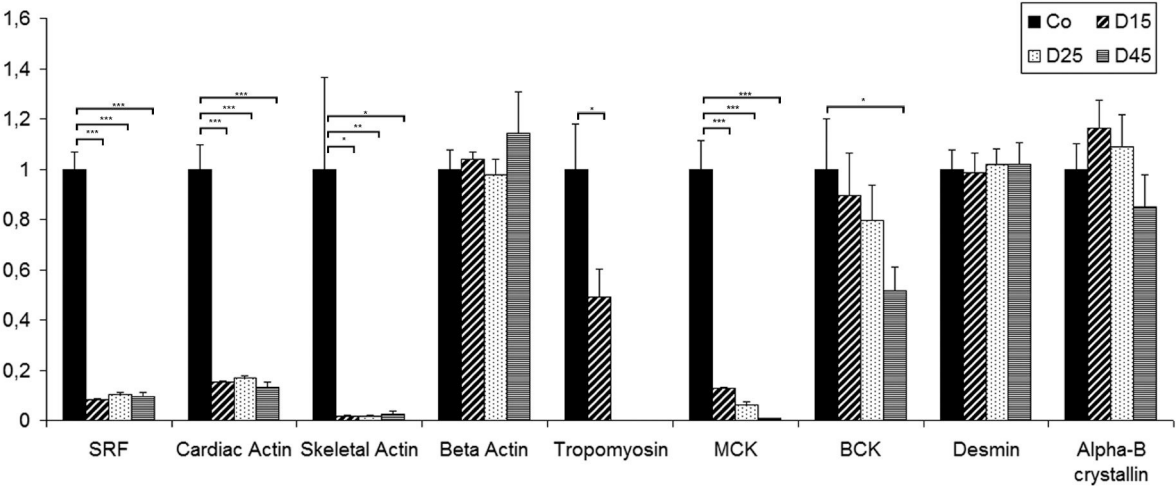

**Fig. S2: Q-PCR Analysis for gene expression in the SRF<sup>HKO</sup>**  
Messenger RNA expression was analyzed by RT-qPCR in controls and SRF mutants at 15, 25 and 45 days extracts HPRT as a control gene for normalization.  
\*: p≤0.05, \*\*: p≤0.01, \*\*\*: p≤0.05

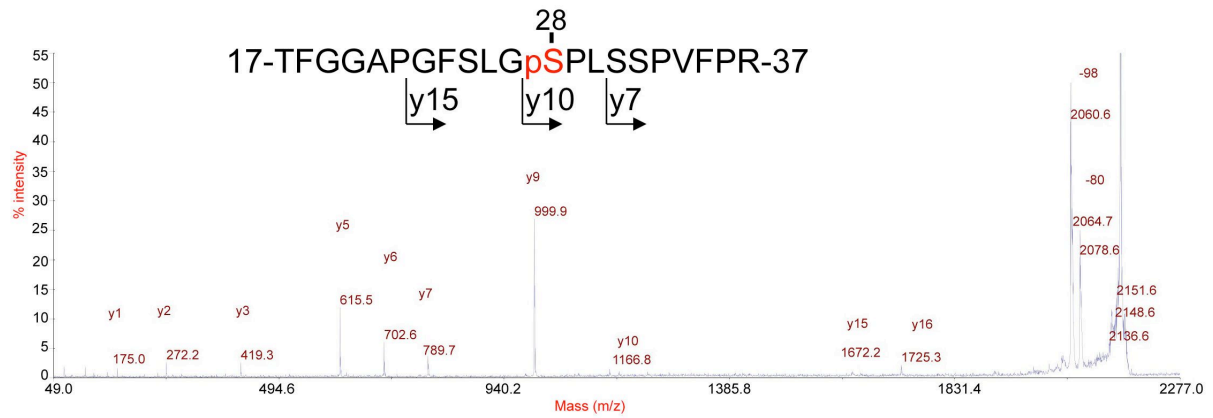

**Fig. S3: MS/MS spectrum of the 2158.08 ion showing the phosphorylation of serine 28.** The spectrum is annotated for the y-ions series, which fit with a single phosphate group added to serine 28. Note the 2 peaks at 2060.06 and 2078.6 with a typical loss of the phosphate group (-98 or -80).

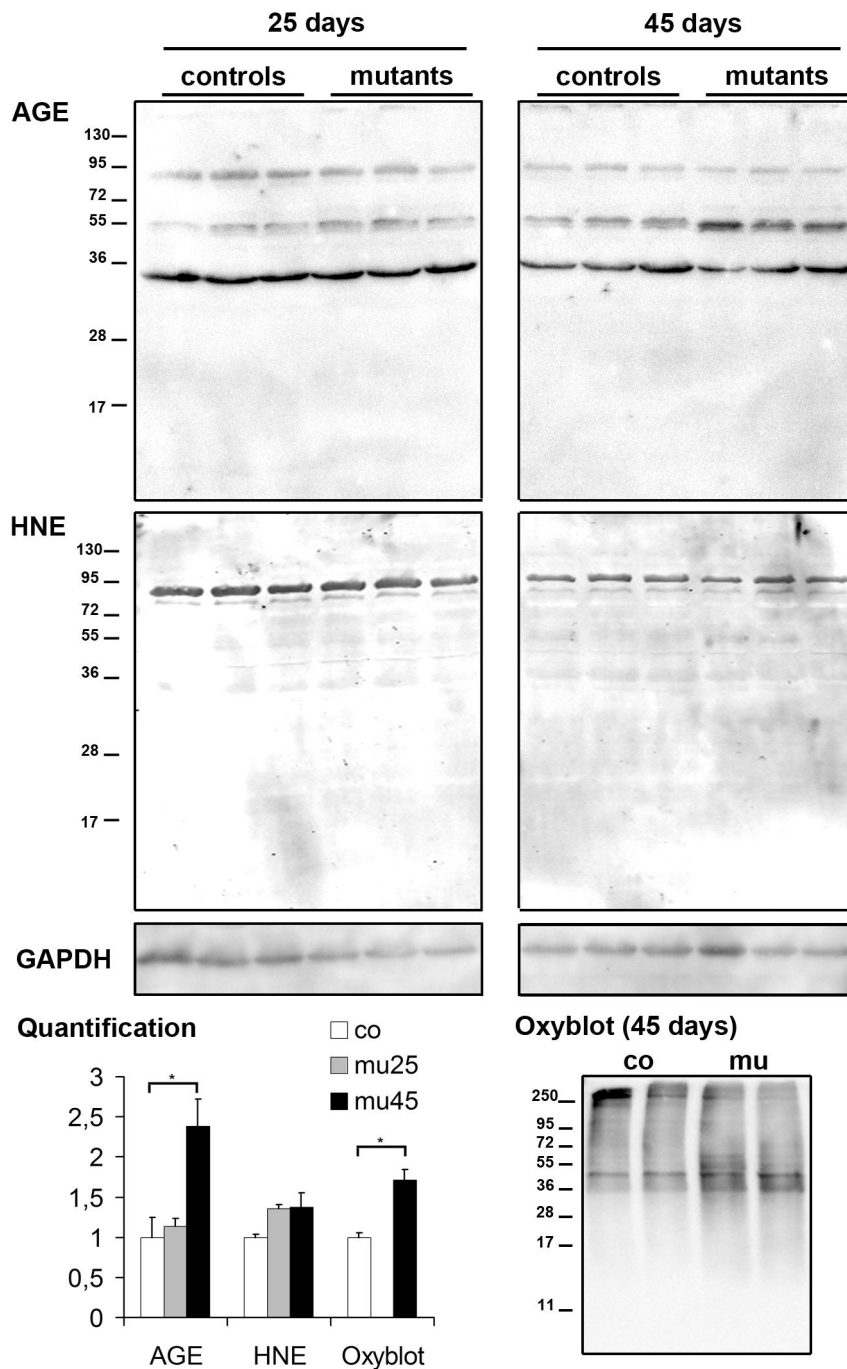

**Fig. S4: Analysis of post-translational modifications associated with oxidative stress.** 1D western blot with anti-AGE (Advanced Glycation End-product), anti-HNE (4-hydroxy-2-nonenal lipid peroxidation product) and Oxyblot protein oxidation detection revealing oxidized protein. Quantification of AGE western blot is shown at 25 and 45 days after SRF inactivation.

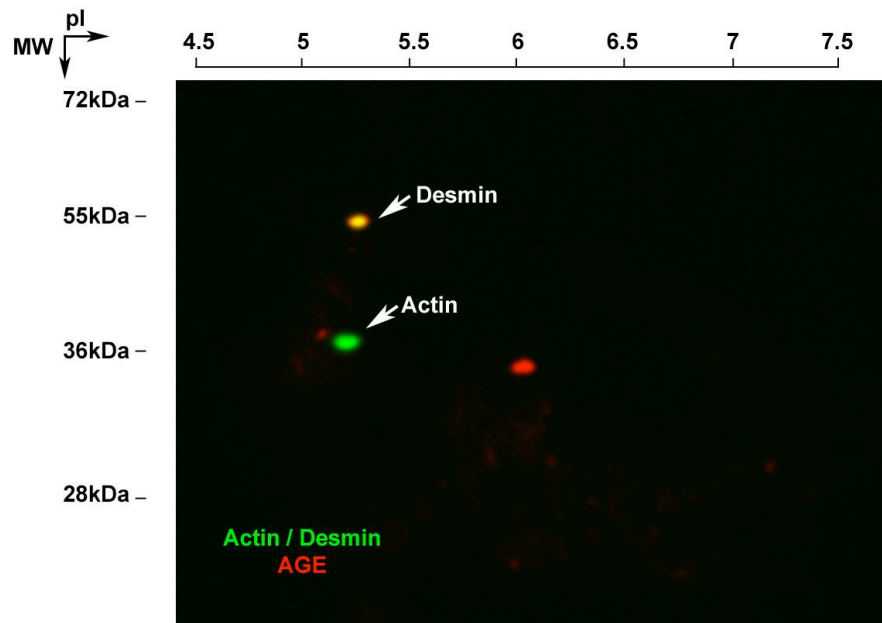

**Fig. S5: 2D Western blot for desmin, sarcomeric actin and AGE antibodies.**

Cardiac protein extracts from  $\text{SRF}^{\text{HKO}}$  at 45 days were analyzed by 2D-PAGE electrophoresis and blotted on PVDF membranes. Membranes were incubated simultaneously with mouse monoclonal antibodies against desmin and sarcomeric actin and rabbit polyclonal anti-AGE antibody followed by revelation with IR fluorescent dye couple secondary antibodies against mouse IgG (green) and rabbit IgG (red). Merge of green and red channel show the desmin spot in orange because it is co-labelled by anti-desmin and anti-AGE. Actin is not labelled by the anti-AGE antibody and appears in the green channel only. Additional spots in red highlight other unidentified glycosylated proteins.



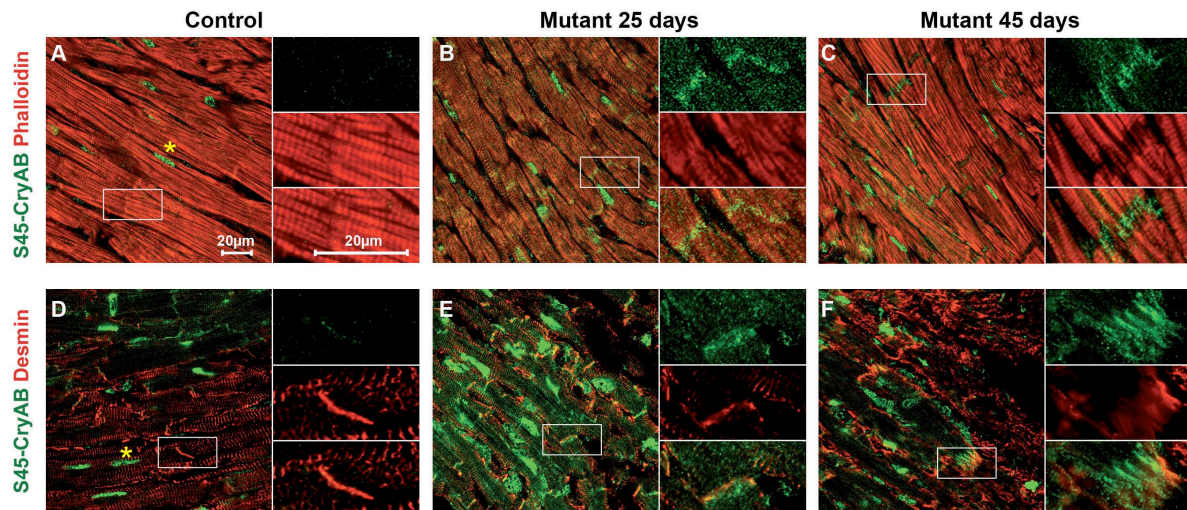

**Fig. S6: Changes in phospho-S45  $\alpha$ B-crystallin and desmin localization in  $SRF^{HKO}$  cardiomyocytes.** Immunofluorescent co-staining for phospho-S45  $\alpha$ B-crystallin and F-actin (phalloidin-TRITC) or desmin on heart tissue sections at D25 and D45. (A, D) control, (B, E) mutant 25 days, (C, F) mutant 45 days. Upper panel (A-C): anti-phospho-S45  $\alpha$ B-crystallin (green) and phalloidin-TRITC (red) Lower panel (D-F): anti-phospho-S45  $\alpha$ B-crystallin (green) and anti-Desmin (red). Insets: higher magnification of boxed area. \*: nuclear staining with anti-phospho-S45  $\alpha$ B-crystallin. The presence of some forms of  $\alpha$ B-crystallin in the nucleus has been reported by others (1).

(1). Nuclear import of  $\alpha$ B-crystallin is phosphorylation-dependant and hampered by hyperphosphorylation of the myopathy-related mutant R120G. den Engelsman J. et al. J. Biol. Chem. 2005; 280; 37139-48.

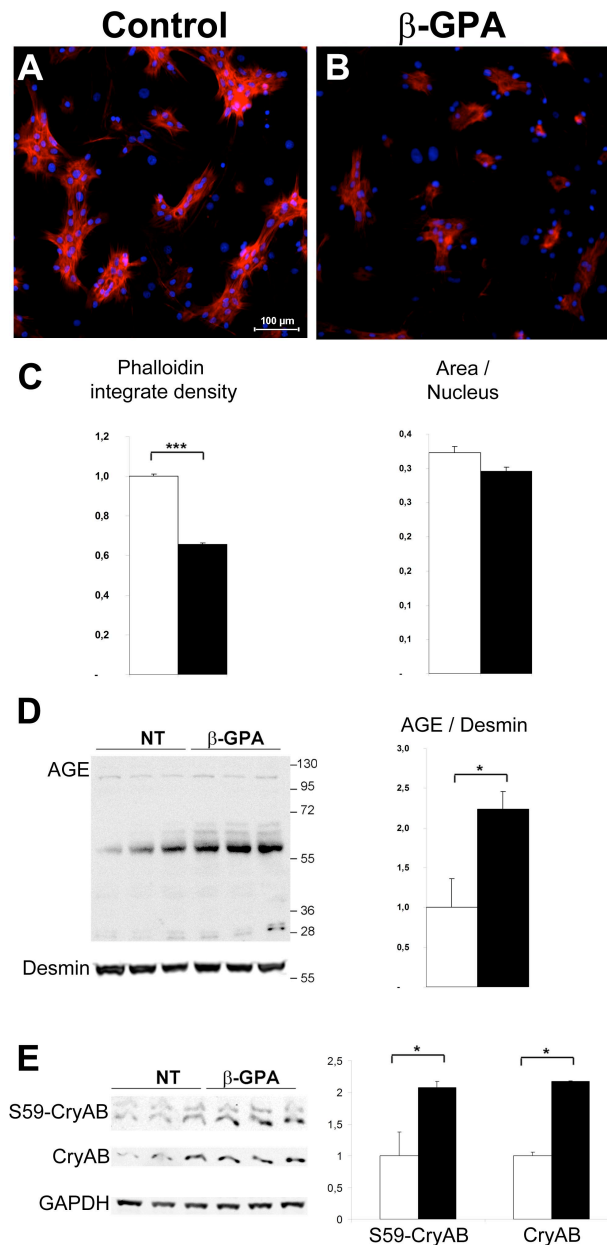

**Fig. S7: Inhibition of creatine/phosphocreatine shuttle by the  $\beta$ -GPA competitor leads to actin depolymerization,  $\alpha$ B-crystallin phosphorylation and AGE formation on desmin:** Neonatal rat cardiomyocytes were isolated and cultured in presence or not of  $\beta$ -GPA (10 mM) from day 3 to 8 after plating. **(A-B)** Fluorescence staining for F-actin (phalloidin-TRITC) and nucleus (Hoechst). **(C)** Quantification of the phalloidin signal integrate density and cell area was measured on individual cardiomyocytes (N=300) and normalized by the number of nuclei. For the phalloidin signal integrate density, data are expressed as a fold change over mean control value. **(D)** Western-blot analysis of control and  $\beta$ -GPA treated cardiomyocytes with anti-AGE, -Desmin antibodies (left) and quantification of AGE/desmin ratio (right). **(E)** Western-blot analysis of control and  $\beta$ -GPA treated cardiomyocytes with anti- $\alpha$ B-crystallin (CryAB), -phospho-S59-CryAB and -GAPDH antibodies. Quantification of Western-blot (N=3 for each group). Band intensities are normalized on GAPDH as a loading control. Ratios are expressed as fold change over mean control value  $\pm$  s.e.m. \*:  $p \leq 0.05$ .
